# Supplementary material for: Influence of Long‐Term Thinning on the Biomass Carbon and Soil Respiration in a Larch (Larix gmelinii) Forest in Northeastern China
Source: Hindawi journal article supplement (doi:10.1155/2013/865645), 2013-01-01
Supplement: f1 [file 865645.f1.docx]

Table s1. Allometric equations for trees in the arbor layer, and shrubs and saplings in the study plantation. (DBH/BD: cm; height (H): m; biomass (W): kg; Ws = shoot biomass, Wl = leaf biomass, Wb = branch biomass, and Wr = root biomass)

|  | Species | | Equation | *r*2 | Range |
| --- | --- | --- | --- | --- | --- |
| Arbor layer | *Larix gmelinii* | Ws (kg) | Ws=0.0196 (D2H)1.007 | 0.97 | DBH: 6–28 cm  H: 7–22 m |
| Wl (kg) | Wl=0.0006 (D2H)0.934 | 0.73 |
| Wb (kg) | Wb=0.0022(D2H)0.718 | 0.61 |
| Wr (kg) | Wr=0.00169(D2H)1.1881 | 0.98 |
| *Betula platyphylla* | Ws (kg) | Ws=0.04939 (D2H)0.9011 | 0.91 | DBH: 6–26 cm  H: 8–22 m |
| Wl (kg) | Wl=0.01417 (D2H)0.7686 | 0.89 |
| Wb (kg) | Wb=0.0109 (D2H)0.6472 | 0.88 |
| Wr (kg) | Wr=0.0110 (D2H)0.9209 | 0.92 |
| *Franxinus mandshurica* | Ws (kg) | Ws=0.02511 (D2H)0.9271 | 0.99 | DBH: 8–38 cm  H: 7–23 m |
| Wl (kg) | Wl=0.00957 (D2H)0.9740 | 0.96 |
| Wb (kg) | Wb=0.8725 (D2H)0.2634 | 0.89 |
| Wr (kg) | Wr=0.0303 (D2H)0.0.8058 | 0.91 |
| Shrub and sapling layer | *Syringa amurensis* | Wt (kg) | Wt= 0.0657 (D2H)0.6774 | 0.89 | BD: 0.3–3.7 cm;H: 0.5–3.5 m |
| *Fraxinus mandshurica* | Wt (kg) | Wt = 0.0398 (D2H)0.7185 | 0.96 | BD: 0.7–5.5 cm; H: 0.5–5.45 m |
| *Ulmus propinqua* | Wt (kg) | Wt = 0.0502 (D2H)0.7465 | 0.93 | BD: 0.7–5.8 cm;H: 0.5–5.5 m |
| *Tilia amurensis* | Wt (kg) | Wt = 0.0657 (D2H)0.5943 | 0.80 | BD: 0.8–4.0 cm;H: 1–3.9 m |
| *Corylus heterophylla* | Wt (kg) | Wt = 0.0368 (D2H)0.802 | 0.96 | BD: 1.4–5.4 cm;H: 1.3–6.5 m |
| *Pinus koraiensis* | Wt (kg) | Wt = 0.0384 (D2H)0.8355 | 0.98 | BD:1.0–5.4 cm; H:0.83–4.5 m |
| *Acer mono* | Wt (kg) | Wt = 0.0251 (D2H)0.7868 | 0.94 | BD: 1.0–5.4 cm;H: 1.05–5.2 m |
| Other species | Wt (kg) | Wt = 0.047 (D2H)0.7129 | 0.91 | BD: 0.3–5.8 cm;H: 0.5–6.5 m |

Table s2. Differences in soil microbe, root, and litter respiration between the unthinned and thinned sites during different seasons from 2005 to 2007. Data in parentheses are the standard deviation of data measured in different months.

|  | Respiration(μmol.m-2s-1) | | % Contribution to Rt | |
| --- | --- | --- | --- | --- |
| Unthinned | Thinned | Unthinned | Thinned |
| Soil microbial Respiration | | | | |
| Spring | 0.95 (0.37) | 1.09 (0.46) | 55.9 | 73.6 |
| Summer | 1.70 (0.49) | 1.65 (0.42) | 55.2 | 54.5 |
| Autumn | 1.46 (0.64) | 1.39 (0.63) | 65.2 | 69.2 |
| Total mean | 1.44 (0.57) | 1.43 (0.51) | 58.8 | 65.8 |
| Root respiration | | | | |
| Spring | 0.26 (0.27) | 0.05 (0.17) | 15.3 | 3.4 |
| Summer | 0.47 (0.57) | 0.35 (0.44) | 15.3 | 11.6 |
| Autumn | 0.34 (0.33) | 0.25 (0.25) | 15.2 | 12.4 |
| Total mean | 0.38 (0.45) | 0.24 (0.36) | 15.2 | 9.1 |
| Litter respiration | | | | |
| Spring | 0.49 (0.43) | 0.34 (0.39) | 28.8 | 23.0 |
| Summer | 0.91 (0.78) | 1.04 (0.83) | 29.5 | 34.3 |
| Autumn | 0.45 (0.46) | 0.37 (0.37) | 20.1 | 18.4 |
| Total mean | 0.69 (0.65) | 0.69 (0.71) | 26.2 | 25.2 |
| Total soil respiration | | | | |
| Spring | 1.70 (0.96) | 1.48 (0.80) | 100.0 | 100.0 |
| Summer | 3.08 (0.93) | 3.03 (0.80) | 100.0 | 100.0 |
| Autumn | 2.24 (1.20) | 2.01 (1.02) | 100.0 | 100.0 |
| Total mean | 2.51 (1.12) | 2.37 (1.06) | 100.0 | 100.0 |

Fig. s1 Difference in daily respiration rate of different components of soil between thinned and unthinned sites. a) Respiration of soil microbes; b) respiration of roots; c) respiration of litter; d) total soil respiration.
